# Supplementary material
Source: Springer Nature journal article supplement (https://www.springermedizin.de/resource/supplementary/12943_2010_885_MOESM2_ESM.pdf/9551914)

**log EBV DNA load (copies/brushing)**

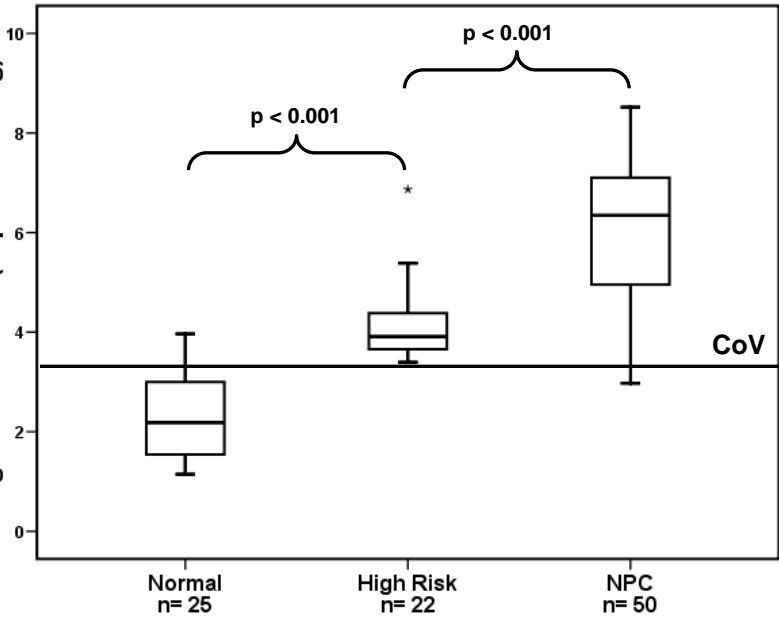

Supplement: MOESM2 [file 9551914]
